# Supplementary material for: Metalloborospherenes with the stabilized classical fullerene-like borospherene B36as electric field manipulated second-order nonlinear optical switches
Source: Royal Society of Chemistry journal article supplement (doi:10.1039/d2nj04111a), 2022-01-01
Supplement: d2nj04111a1.pdf [file d2nj04111a1.pdf]

Electronic Supplementary Material (ESI) for *New Journal of Chemistry*.

This journal is © The Royal Society of Chemistry and the Centre National de la Recherche Scientifique
