# Supplementary material for: Metalloborospherenes with the stabilized classical fullerene-like borospherene B36as electric field manipulated second-order nonlinear optical switches
Source: Royal Society of Chemistry journal article supplement (doi:10.1039/d2nj04111a), 2022-01-01
Supplement: d2nj04111a2.pdf [file d2nj04111a2.pdf]

# **Metalloborospherenes with a Stabilized Classical Fullerene-Like Borospherene B<sub>36</sub> as Electric Field Manipulated Second-Order Nonlinear Optical Switches**

Weihong Chen,<sup>a</sup> Jiayuan Liu,<sup>b</sup> Weiming Sun,<sup>c</sup> Huimin He,<sup>d</sup> Shansheng Yu,<sup>\*a</sup> Ying Li<sup>\*e</sup>, and Zhiru Li<sup>\*e</sup>

<sup>a</sup> *Key Laboratory of Automobile Materials of MOE and Department of Materials Science, Jilin University, Changchun, 130012, China*

<sup>b</sup> *Institute of Applied Chemistry, Hebei North University, Zhangjiakou, 075000, China*

<sup>c</sup> *Department of Basic Chemistry, The School of Pharmacy, Fujian Medical University, Fuzhou, 350108, People's Republic of China*

<sup>d</sup> *Institute of Computational and Applied Physics, Department of Physics, Taiyuan Normal University, Jinzhong, 030600, China*

<sup>e</sup> *Laboratory of Theoretical and Computational Chemistry, Institute of Theoretical Chemistry, College of Chemistry, Jilin University, Changchun, 130023, China*

## **Corresponding Authors**

E-mail: [yuss@jlu.edu.cn](mailto:yuss@jlu.edu.cn) (Shansheng Yu)

E-mail: [liyingedu@jlu.edu.cn](mailto:liyingedu@jlu.edu.cn) (Ying Li)

E-mail: [lzc@jlu.edu.cn](mailto:lzr@jlu.edu.cn) (Zhiru Li)

Table S1. The symmetry, B-B bond lengths shared between two five-membered rings ( $d_{5-5}$ , in Å), B-B bond lengths shared between a five and a six membered ring ( $d_{5-6}$ ,  $d_{6-5}$ , in Å), B-B bond lengths between two six-membered rings ( $d_{6-6}$ , in Å), B-Mg bond lengths ( $d_1$ , in Å), top and lumbar B-Li bond lengths ( $d_2$ ,  $d_3$ , in Å), horizontal and vertical diameters ( $D_1$ ,  $D_2$  in Å) for  $\text{Mg}_{12}\text{Li}_8\&\text{B}_{36}$ .

| Level           | Symmetry | $d_{5-5}$ | $d_{6-6}$ | $d_{6-5}$ | $d_{5-6}$ | $d_1$ | $d_2$ | $d_3$ | $D_1$ | $D_2$ |
|-----------------|----------|-----------|-----------|-----------|-----------|-------|-------|-------|-------|-------|
| PBE0/6-311G(d)  | $D_{6h}$ | 1.799     | 1.705     | 1.716     | 1.744     | 2.304 | 2.193 | 2.204 | 6.1   | 6.5   |
| PBE0/6-311+G(d) | $D_{6h}$ | 1.799     | 1.705     | 1.716     | 1.744     | 2.304 | 2.193 | 2.204 | 6.1   | 6.5   |
| TPSSH/6-311G(d) | $D_{6h}$ | 1.805     | 1.708     | 1.722     | 1.749     | 2.311 | 2.204 | 2.216 | 6.1   | 6.5   |
| B3LYP/6-311G(d) | $D_{6h}$ | 1.798     | 1.710     | 1.719     | 1.747     | 2.318 | 2.193 | 2.206 | 6.1   | 6.4   |

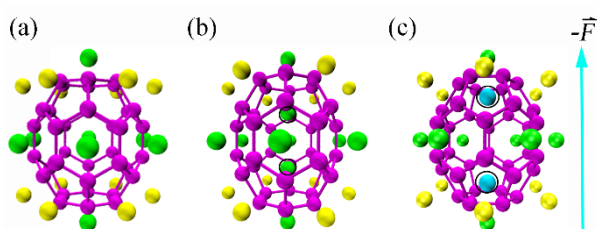

Figure. S1 Optimized structures of  $\text{Mg}_{12}\text{Li}_8\&\text{B}_{36}$  (a),  $\text{Mg}_{12}\text{Li}_8\&(\text{Li}_2@B_{36})$  (b),  $\text{Mg}_{12}\text{Li}_8\&(\text{Be}_2@B_{36})$  (c) and the direction of external electric field (light blue arrow).

Table S2.  $\beta_0$  ( $10^4$  au) values of  $\text{Mg}_{12}\text{Li}_8\text{B}_{36}$  calculated by different density functionals in conjunction with the 6-311+G(d) for Mg, and 6-31+G(d) for B as well as 6-31G(d) basis set for Li atoms.

| $F$       | 0   | 5   | 10  | 15  | 20  | 30  | 40   | 45   | 50   | 55   | 60   | 70   |
|-----------|-----|-----|-----|-----|-----|-----|------|------|------|------|------|------|
| M06-2X    | 0.0 | 0.4 | 0.8 | 1.6 | 2.3 | 3.9 | 6.2  | 8.3  | 11.9 | 86.1 | 3.6  | 9.7  |
| LC-PBEPBE | 0.0 | 0.1 | 0.5 | 1.0 | 1.3 | 2.4 | 24.5 | 34.7 | 49.6 | 61.0 | 48.9 | 28.6 |
